# Supplementary material for: Ovarian hormones modulate multidrug resistance transporters in the ovary
Source: PubMed Central journal article supplement (PMC6236903; doi:10.1186/s40834-018-0076-7), 2018-11-15

# Supplemental Figure 1

ESR1 1

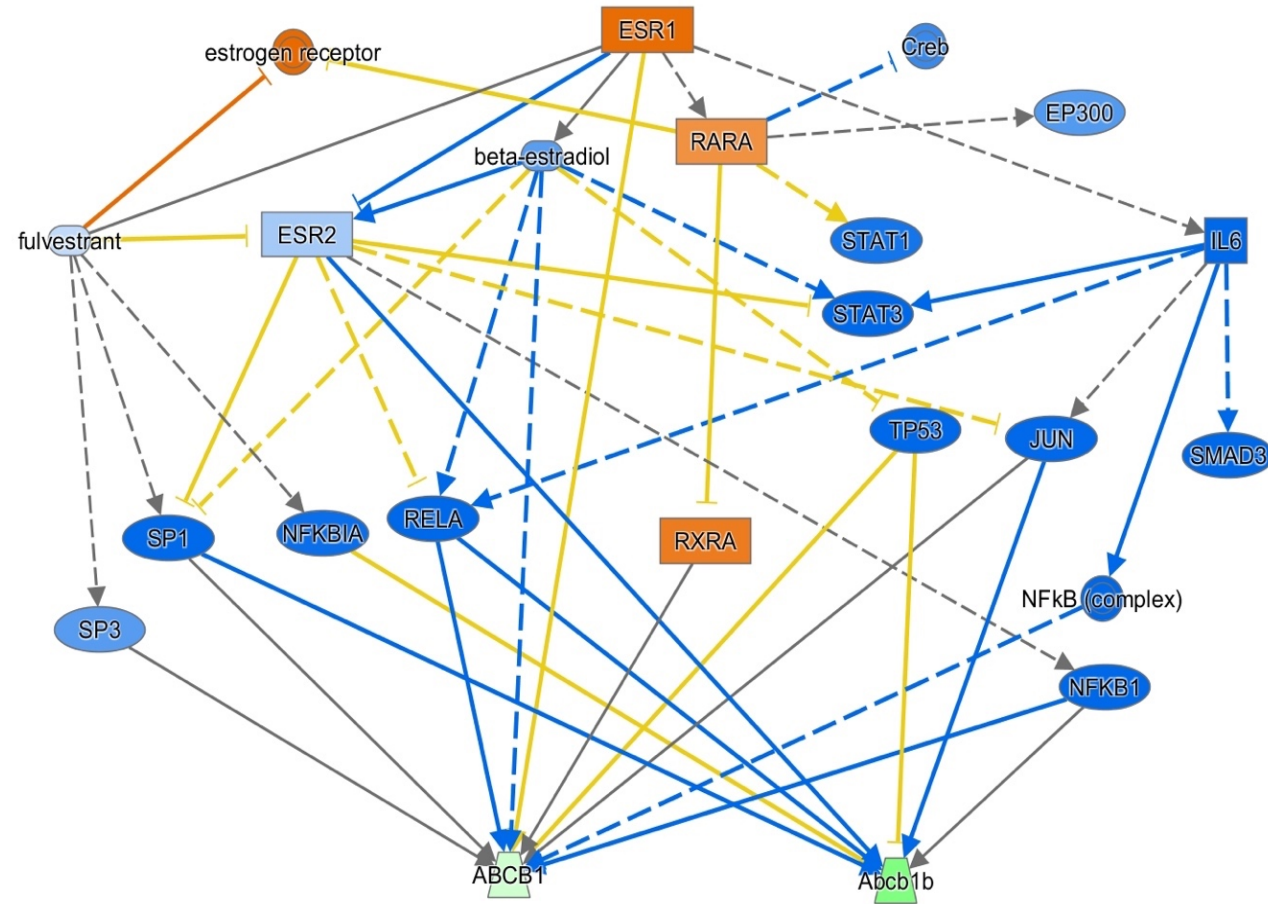

Supplement: 40834_2018_76_MOESM1_ESM.pdf [file 40834_2018_76_MOESM1_ESM.pdf]
